# Supplementary material
Source: PubMed Central journal article supplement (PMC3002478)
Supplement: supp_mcq221_mcq221supp2.pdf [file supp_mcq221_mcq221supp2.pdf]

## SUPPLEMENTARY DATA

TABLE. S1. Root lengths (mm) and sample numbers used for the methylene blue experiments to characterize patterns of radial oxygen loss, as described in Fig. 6.

|             |          | Hours after treatment |     |     |     |     |     |     |     |
|-------------|----------|-----------------------|-----|-----|-----|-----|-----|-----|-----|
|             |          | 0                     | 6   | 12  | 24  | 48  | 72  | 96  | 120 |
| Short roots | Mean     | 73                    | 68  | 82  | 82  | 81  | 88  | 82  | 119 |
|             | s.e.     | 2                     | 6   | 2   | 5   | 4   | 7   | 3   | 5   |
|             | <i>n</i> | 11                    | 7   | 13  | 14  | 14  | 4   | 9   | 5   |
| Long roots  | Mean     | 120                   | 135 | 132 | 142 | 159 | 145 | 140 | 143 |
|             | s.e.     | 5                     | 6   | 3   | 7   | 5   | 8   | 5   | 11  |
|             | <i>n</i> | 11                    | 10  | 14  | 14  | 14  | 4   | 8   | 5   |

Short (65–90 mm) and long (105–130 mm) adventitious roots were used (lengths at commencement of treatment). Plants were raised for 3–4 weeks in aerated nutrient solution, prior to transfer to stagnant deoxygenated agar nutrient solution for 0, 6, 12, 24, 48, 72, 96 or 120 h. The samples in this table correspond to the roots in Fig. 6.
